# Supplementary material for: Bioactivity of Curcumin on the Cytochrome P450 Enzymes of the Steroidogenic Pathway
Source: Preprints.org preprint supplement (doi:10.20944/preprints201908.0102.v1), 2019-08-08
Supplement: Supplementary file 1 [file supplementary]

**Supplemental data:**





**Supplementary Figure 1:** Effect of curcuminoids on HEK-293 cells. HEK-293 cells in 96-well culture plates were seeded at a density of 3x105 cells per well and grown overnight at 37°C under 5% CO2, and 90% humidity. After 24 h, the medium was changed, serial dilutions of curcuminoids were added to different wells and incubation of cells was continued for another 24 h. After the incubation with curcuminoids, 20 µl of MTT reagent (5 mg/ml in PBS) was added into each well and the incubation was continued for another 4 h. After the incubation with MTT reagent, culture medium was removed, 200 µl of DMSO was added in each well, and the plate was incubated for 20 min in the dark. The absorbance in individual wells was then measured at 570 nm and calculations of cell viability were performed based on residual MTT reduction activity of cells. Data are mean and standard deviation of three replicates and p values < 0.05 (*) were considered significant.
